# Supplementary material
Source: PubMed Central journal article supplement (PMC1829277)
Supplement: pnas_0602304104_2.pdf [file pnas_0602304104_2.pdf]

A

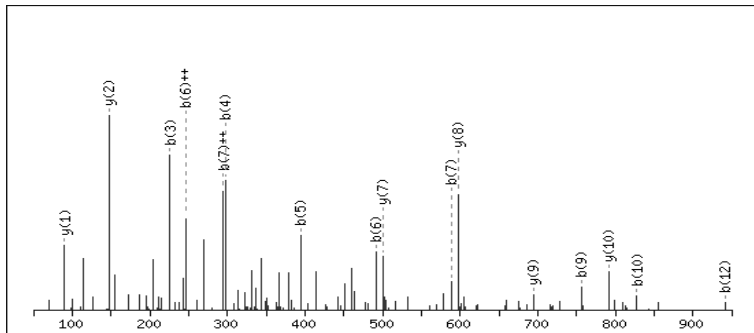

C

MLARSLSYRHRMYRFACRTLMLAACILATGVAGLGVGAQSAQT  
 APVPDYYWCPGQPFDPAWGPNWDPYT**CHDDFHRDSDGPDHSR**  
**DYPGP**ILEGPVLDD**PGAAPPPAAGGGA**-COOH

B

| #  | b      | b <sup>++</sup> | Seq. | y      | y <sup>++</sup> | #  |
|----|--------|-----------------|------|--------|-----------------|----|
| 1  | 98.06  | 49.53           | P    |        |                 | 14 |
| 2  | 155.08 | 78.04           | G    | 990.50 | 495.75          | 13 |
| 3  | 226.12 | 113.56          | A    | 933.48 | 467.24          | 12 |
| 4  | 297.16 | 149.08          | A    | 862.44 | 431.73          | 11 |
| 5  | 394.21 | 197.61          | P    | 791.41 | 396.21          | 10 |
| 6  | 491.26 | 246.13          | P    | 694.35 | 347.68          | 9  |
| 7  | 588.31 | 294.66          | P    | 597.30 | 299.15          | 8  |
| 8  | 685.37 | 343.19          | P    | 500.25 | 250.63          | 7  |
| 9  | 756.40 | 378.71          | A    | 403.19 | 202.10          | 6  |
| 10 | 827.44 | 414.22          | A    | 332.16 | 166.58          | 5  |
| 11 | 884.46 | 442.74          | G    | 261.12 | 131.06          | 4  |
| 12 | 941.48 | 471.25          | G    | 204.10 | 102.55          | 3  |
| 13 | 998.51 | 499.76          | G    | 147.08 | 74.04           | 2  |
| 14 |        |                 | A    | 90.06  | 45.53           | 1  |
