# Supplementary material
Source: PubMed Central journal article supplement (PMC1829277)

**A**

1

2

3

4

107

90

65

50

35

14

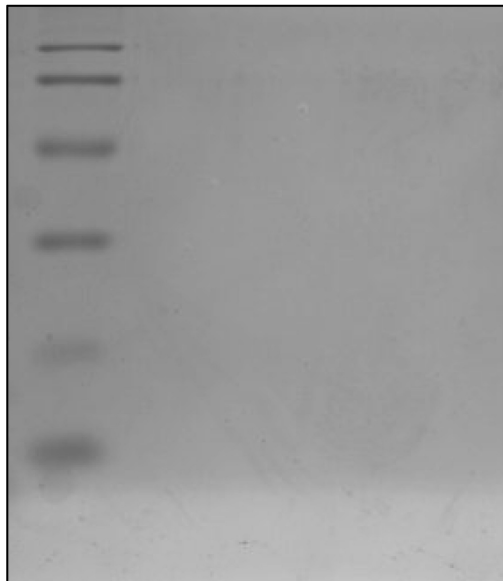**B**

1

2

3

4

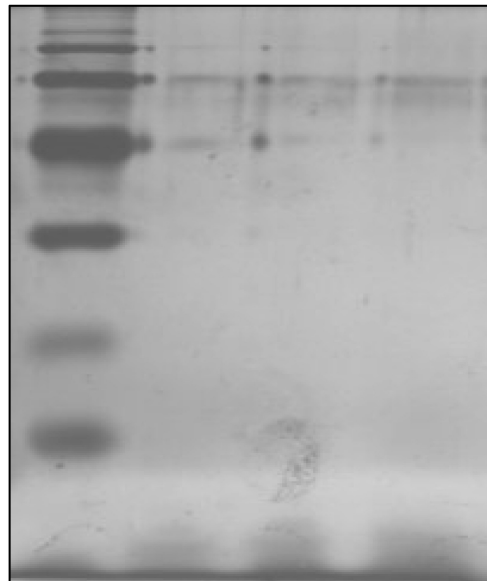

Supplement: pnas_0602304104_1.pdf [file pnas_0602304104_1.pdf]

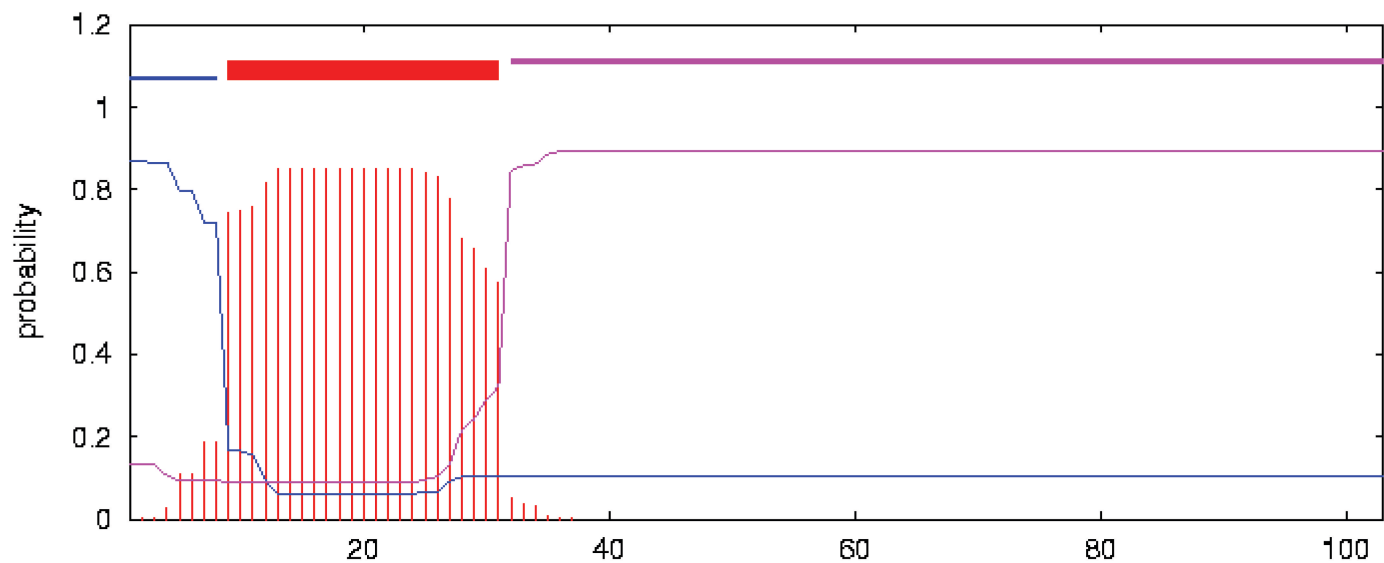

Supplement: pnas_0602304104_3.pdf [file pnas_0602304104_3.pdf]

1 2 3 4 5 6 7 8 9 10 11 12 13

4,000 →

2,000 →

500 →

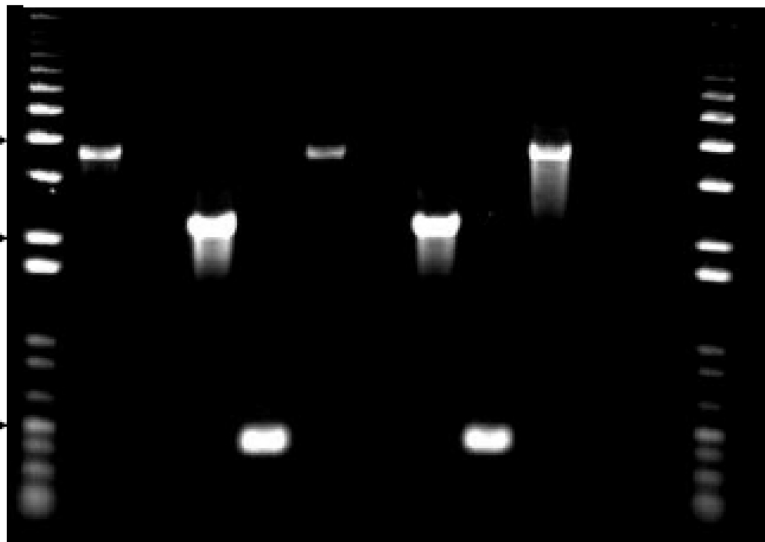

Supplement: pnas_0602304104_5.pdf [file pnas_0602304104_5.pdf]
